# Supplementary material
Source: PubMed Central journal article supplement (PMC9923526)
Supplement: PEDS_20143588SupplementaryData.pdf [file PEDS_20143588SupplementaryData.pdf]

# Supplemental Information

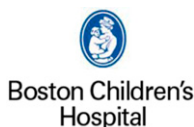

- Inclusion criteria:**
- Isolated blunt head trauma within 24 hours
  - Ages ≤ 21 years<sup>1</sup>
  - Glasgow Coma Score (GCS) ≥ 14

- Exclusion criteria:**
- Comorbidities (neurologic disorders, ventricular shunt, coagulopathy)
  - GCS ≤ 13
  - Concern for non-accidental trauma

## Head Trauma EBG Algorithm © Emergency Department, Boston Children's Hospital

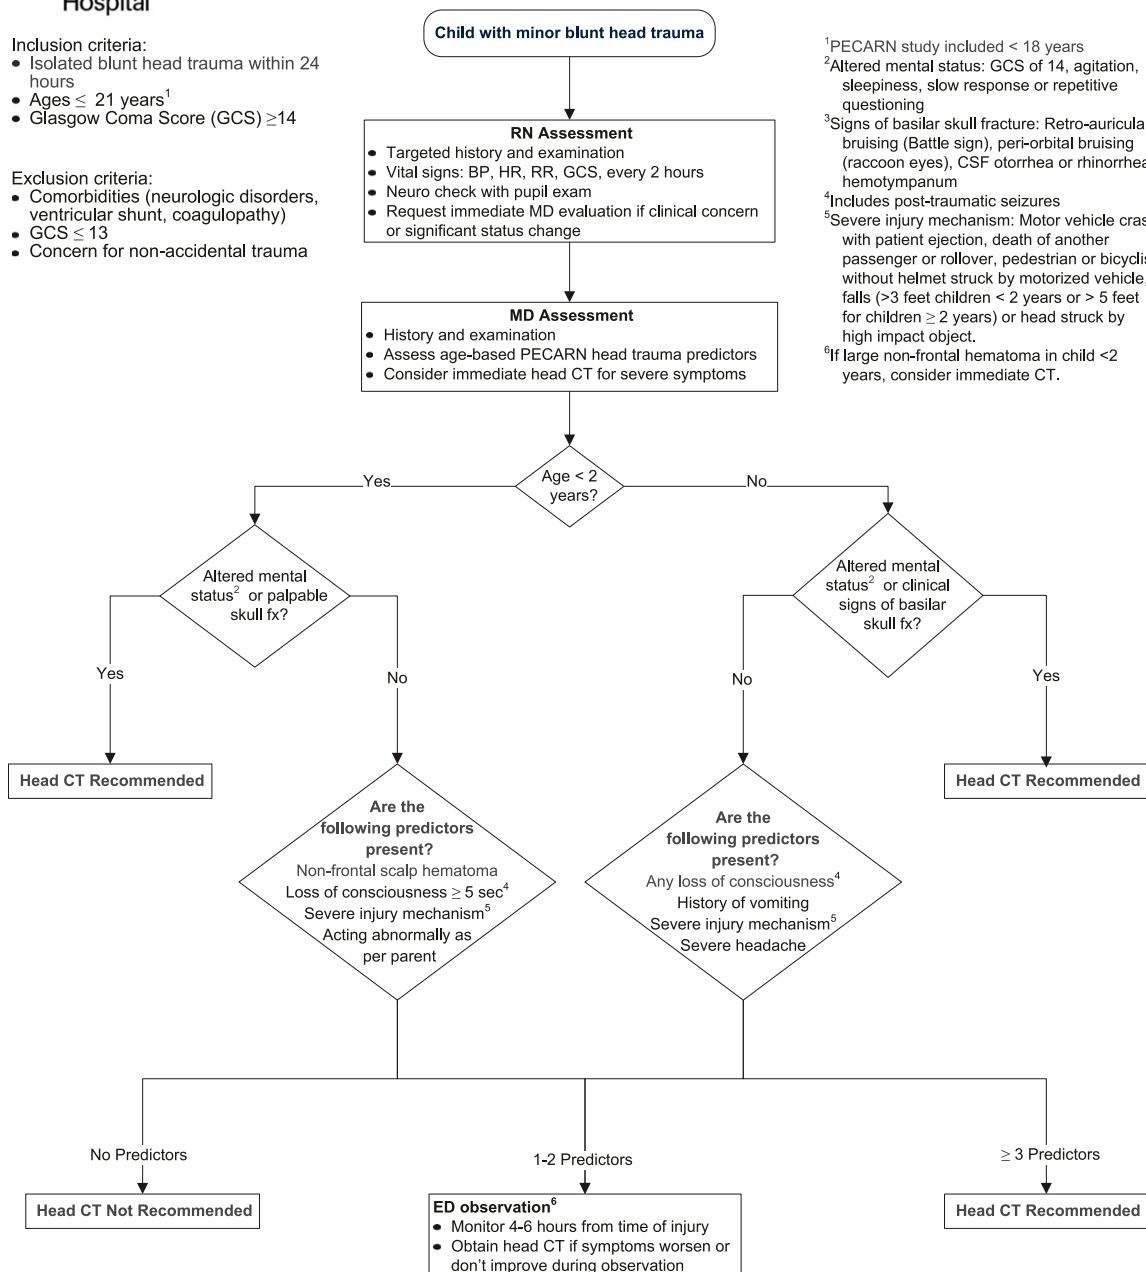

<sup>1</sup>PECARN study included < 18 years  
<sup>2</sup>Altered mental status: GCS of 14, agitation, sleepiness, slow response or repetitive questioning  
<sup>3</sup>Signs of basilar skull fracture: Retro-auricular bruising (Battle sign), peri-orbital bruising (raccoon eyes), CSF otorrhea or rhinorrhea, hemotympanum  
<sup>4</sup>Includes post-traumatic seizures  
<sup>5</sup>Severe injury mechanism: Motor vehicle crash with patient ejection, death of another passenger or rollover, pedestrian or bicyclist without helmet struck by motorized vehicle, falls (>3 feet children < 2 years or > 5 feet for children ≥ 2 years) or head struck by high impact object.  
<sup>6</sup>If large non-frontal hematoma in child <2 years, consider immediate CT.

**NOTE:** The medication dosing contained within these guidelines is provided for reference only. Please refer to your institutional formulary or ordering guidelines when placing orders for clinical care of patients.
